# Feedback Determines the Structure

## of Correlated Variability in Primary Visual Cortex

Adrian G. Bondy<sup>1,2</sup>, Ralf Haefner<sup>3</sup>, and Bruce G. Cumming<sup>1</sup>

<sup>1</sup> Laboratory of Sensorimotor Research, National Eye Institute, NIH

49 Convent Drive, Rm. 2A50

Bethesda, MD 20892

<sup>2</sup> Brown-NIH Neuroscience Graduate Partnership Program

185 Meeting Street, Box GL-N

Providence, Rhode Island 02912

<sup>3</sup> Brain & Cognitive Sciences, University of Rochester

Meliora Hall

Rochester, NY 14627

*Correspondence:*

Adrian Bondy

Princeton Neuroscience Institute

Washington Road

Princeton, New Jersey 08540

[adrian.bondy@gmail.com](mailto:adrian.bondy@gmail.com)

202-460-4821

25           **The variable responses of sensory neurons tend to be weakly correlated (spike-count**  
26 **correlation,  $r_{sc}$ ). This is widely thought to reflect noise in shared afferents, in which case  $r_{sc}$  can limit**  
27 **the reliability of sensory coding. However, it could also be due to feedback from higher-order brain**  
28 **regions. Currently, the relative contribution of these sources is unknown. We addressed this by**  
29 **recording from populations of V1 neurons in macaques performing different discrimination tasks**  
30 **involving the same visual input. We found that the structure of  $r_{sc}$  (the way  $r_{sc}$  varied with neuronal**  
31 **stimulus preference) changed systematically with task instruction. Therefore, even at the earliest**  
32 **stage in the cortical visual hierarchy,  $r_{sc}$  structure during task performance primarily reflects**  
33 **feedback dynamics. Consequently, previous proposals for how  $r_{sc}$  constrains sensory processing**  
34 **need not apply. Furthermore, we show that correlations between the activity of single neurons and**  
35 **choice depend on feedback engaged by the task.**

36           Judgments made about sensory events (i.e. perceptual decisions) rely on the spiking discharge of  
37 sensory neurons. For this reason, there has been longstanding interest in the observation that this discharge  
38 tends to be variable given a fixed stimulus<sup>1,2</sup>. In principle, this variability could confound perceptual  
39 judgments, impairing the fidelity of sensory information in the brain. Even worse, this variability tends to  
40 be weakly correlated amongst sensory neurons (spike-count correlation;  $r_{sc}$ )<sup>3</sup>, meaning it cannot trivially be  
41 averaged away<sup>4</sup>. For this reason,  $r_{sc}$  is widely referred to as “correlated noise”<sup>5-8</sup>.

42           This way of thinking has underlied several influential lines of research in systems neuroscience. One  
43 has sought to understand the magnitude of the perceptual impairment introduced by  $r_{sc}$  in different  
44 behavioral contexts<sup>5,8-15</sup>. When  $r_{sc}$  is distributed in such a way that correlated fluctuations mimic the  
45 sensory events being detected or discriminated, it could severely impair perceptual accuracy<sup>11,15,16</sup>. A  
46 related line of research has sought to understand how correlated variability affects the choices subjects  
47 make in perceptual discrimination tasks from trial to trial<sup>17-19</sup>. These studies have shown that  $r_{sc}$  structure  
48 can give rise to a weak correlation between variability in single neurons and perceptual reports (Choice

49 Probability; CP), consistent with the notion that CP observed in real neurons reflects the causal influence  
50 of correlated sensory neuronal variability on perception.

51 However, we currently know very little about the origin of  $r_{sc}$ , making it unclear to what degree  
52 these conclusions are correct. A frequent (although typically unstated) assumption is that  $r_{sc}$  in sensory  
53 neurons is generated by shared variability in common afferent inputs. Consistent with this idea,  $r_{sc}$   
54 correlates with the physical proximity and similarity in stimulus preference of neuronal pairs<sup>8,20–23</sup>, which  
55 are also predictive of the degree of feedforward input convergence. If this explanation is correct, it  
56 supports the traditional view of  $r_{sc}$  as “confounding noise” since it arises from stochastic processes in the  
57 sensory encoding pathway. However, the bulk of synaptic inputs to sensory cortical neurons are not  
58 strictly “feedforward” in nature<sup>24,25</sup>. Consequently, variation over time in shared inputs from downstream  
59 areas (i.e. “top-down”; “feedback”), may make a significant contribution to  $r_{sc}$ . These signals may reflect  
60 endogenous processes like attention, arousal, or perceptual state, and could be under voluntary control. In  
61 principle, this source of correlated variability need not confound perceptual judgments, but instead reflect  
62 ongoing neuronal computations.

63 Several recent studies have shown that  $r_{sc}$  does change to some degree with task context<sup>12,14,26,27</sup>,  
64 suggesting a top-down component. These studies have shown that  $r_{sc}$  in populations of sensory neurons  
65 can either increase or decrease depending on attentional state or other task demands. However, prior  
66 studies have made only limited measures of  $r_{sc}$  structure and how this changes with task, yet these are  
67 critical for understanding how  $r_{sc}$  arises and how it relates to task performance. Furthermore, the relative  
68 magnitude of feedforward versus top-down contributions to  $r_{sc}$  has not been determined. It also unknown  
69 whether task-dependent changes in  $r_{sc}$  reflect an adaptive reduction of sensory noise or whether  $r_{sc}$  is, in  
70 the first instance, generated by variability over time in top-down inputs reflecting downstream  
71 computations.

72 In the present study, we used large-scale neuronal population recordings in behaving macaques,  
73 along with careful behavioral control and a novel analytical approach, to significantly advance our  
74 understanding of these fundamental questions. Subjects performed different orientation discrimination  
75 tasks using the same set of stimuli. The only difference between tasks was the set of orientations being  
76 discriminated. If  $r_{sc}$  primarily reflects noisy sensory encoding, it should be invariant to changes in the task  
77 given fixed retinal input. Alternatively, if it changes dynamically with the task, this would indicate that it  
78 reflects top-down signals. This experimental approach, inspired by a previous study<sup>27</sup>, was combined with  
79 large-scale population recordings, allowing us to estimate the full  $r_{sc}$  matrix – that is, how  $r_{sc}$  varies as a  
80 function of all possible combinations of pairwise orientation preference. This made it possible to directly  
81 infer which components were fixed and which changed with the task. Strikingly, we could not identify a  
82 component that remained fixed. Instead we observed a pattern of task-dependent changes that was highly  
83 systematic, and could be modeled as the effect of a single modulatory input that targets the two task-  
84 relevant subpopulations of V1 neurons in an alternating fashion across trials.

85 These data give unprecedented insight into the functional role of  $r_{sc}$  structure in task performance.  
86 First, they show that the task-dependent changes in  $r_{sc}$  structure appear to degrade the task performance of  
87 an ideal observer of V1 activity alone, because they mimic task-relevant stimulus changes. However, our  
88 discovery of the feedback origin of these correlations means that they need not degrade performance, and  
89 points to the possibility that they may instead be a signature of ongoing neuronal computations. Indeed,  
90 recent circuit models of perceptual inference predict feedback signals whose statistics reflect the subject's  
91 prior beliefs about the task, yielding predictions which closely match our observations<sup>28,29</sup>. Second, we  
92 show quantitatively that these feedback dynamics are the primary source of the choice-related activity we  
93 observed in V1, clarifying an ongoing debate<sup>30</sup> about the interpretation of choice-related signals in sensory  
94 neurons. We conclude that  $r_{sc}$  in sensory neurons reveals less than previously thought about the encoding  
95 of sensory information in the brain, but potentially much more about the interareal computations  
96 underlying sensory processing.

97

## 98 **Results**

99       We trained two rhesus monkeys (*Macaca mulatta*) to perform a two-alternative forced choice  
100 (2AFC) coarse orientation discrimination task (Fig. 1), used previously<sup>31</sup>. On a given trial, the subject was  
101 shown a dynamic, 2D filtered noise stimulus for 2 seconds, after which it reported the stimulus orientation  
102 by making a saccade to one of two choice targets (oriented Gabor patches). Different task contexts were  
103 defined by the pair of discriminandum orientations. The stimuli were bandpass filtered in the Fourier  
104 domain to include only orientations within a predetermined range. The stimulus filter was centered on one  
105 of the two task orientations and its orientation bandwidth was used to control task difficulty. We included  
106 0%-signal trials, for which the stimuli were unfiltered for orientation (and thus the same regardless of  
107 context), to examine the effect of task context on  $r_{sc}$  in the presence of a fixed retinal input.

108       In order to detect any effect of task context on  $r_{sc}$  structure, it is critical that subjects based their  
109 choices on the presence of the correct orientation signals. To ensure this, we used psychophysical reverse  
110 correlation<sup>31-33</sup> to directly measure the influence of different stimulus orientations on the subject's choices  
111 (the "psychophysical kernel"). We found that subjects required multiple days of retraining after a change  
112 in the task context to fully update their psychophysical kernel. For this reason, we kept the task context  
113 fixed for the duration of each recording session, and only undertook recordings in a new task context after  
114 subjects had updated their kernel (Supplementary Fig. 1). This is a significant advance over past studies of  
115 the effect of task context on neuronal responses, which typically have not quantified the extent to which  
116 behavioral strategy truly matches task instruction.

117       We recorded spiking activity in populations of single V1 neurons using multi-electrode arrays  
118 while the subjects performed the task. We determined the preferred orientation of each neuron by  
119 measuring its response to oriented stimuli (see Methods) in separate blocks of trials during which subjects  
120 passively fixated. Neurons were excluded from analysis if they were not well orientation tuned. The final

121 dataset includes 811 simultaneously recorded pairs from 200 unique cells across 41 recording sessions.  
122 For each pair, we calculated its  $r_{sc}$  value as the Pearson correlation between the set of trial-duration spike-  
123 counts across trials of the same stimulus condition. While measuring  $r_{sc}$  only across 0%-signal trials  
124 isolated any changes due to the task context, we found similar results within each signal level (Fig. 6).  
125 Therefore, to increase statistical power, we report  $r_{sc}$  values measured across all trials, after normalizing  
126 spike counts to remove the effect of stimulus drive on firing rates.

127

### 128 **$R_{sc}$ structure changes systematically with task context**

129 Recording large populations gave us the power to measure the full “ $r_{sc}$  matrix”: that is, how  $r_{sc}$   
130 varied as a function of all possible combinations of orientation preference. This is the first time that such  
131 detailed measures of  $r_{sc}$  structure have been made while animals perform a discrimination task. To assess  
132 the presence of task-dependent  $r_{sc}$  structure in the data, we we first divided the recording sessions into two  
133 groups based on the task context used (Fig. 2b). We estimated the smoothed, average  $r_{sc}$  matrix associated  
134 with each subset (Fig. 2a,c) by pooling  $r_{sc}$  values measured across the subset of sessions along with  
135 measures of the neuronal preferred orientation. Across both subsets of sessions, we observed a tendency  
136 towards higher values of  $r_{sc}$  for pairs of neurons with more similar orientation preferences (i.e. higher  
137 values closer to the diagonal of the matrix), consistent with numerous prior observations<sup>3</sup> (Fig. 2d).  
138 Traditionally, such observations were presumed to reflect “limited-range correlations” that depend only on  
139 similarity in stimulus preference<sup>5,9,10</sup>, equivalent to a rotationally-symmetric (Toeplitz) correlation matrix.  
140 In contrast, in our data this was due to distinct patterns in the two matrices: we observed the highest values  
141 of  $r_{sc}$  amongst pairs that shared a preferred orientation close to a discriminandum, and the lowest values of  
142  $r_{sc}$  tended to occur amongst pairs preferring opposite task orientations. Because the task context differed  
143 between the two subsets, this yielded matrices with a lattice-like pattern offset along the diagonal by an  
144 amount reflecting the task context. In other words,  $r_{sc}$  structure changed dramatically with task context,

145 consistent with the presence of task-dependent feedback and inconsistent with a fixed  $r_{sc}$  structure  
146 primarily driven by sensory afferent noise.

147 To summarize this task-dependent structure across the entire dataset (Fig. 2e) we expressed each  
148 neuron's preferred orientation relative to the task orientations on its respective recording session, such that  
149  $0^\circ$  and  $90^\circ$  always indexed the task orientations. This combined matrix clearly illustrates the task-  
150 dependent pattern of  $r_{sc}$  structure in the V1 population, a pattern that was consistent across both subjects  
151 (Supplementary Fig. 2). As in previous studies, there was a great deal of variability between individual  $r_{sc}$   
152 values, even amongst pairs with similar orientation preferences and task (Fig. 2d,f) demonstrating that  
153 factors not considered here also contribute to  $r_{sc}$ .

154 Importantly, we observed a different result during separate blocks of trials in the same recording  
155 sessions, during which the subject fixated passively for reward but the same set of stimuli was shown.  
156 During these blocks, the highest values of  $r_{sc}$  tended to occur along the diagonal, independent of  
157 orientation preference or task (Supplementary Fig. 3). This demonstrates that the task-dependent pattern  
158 observed during task performance depends on active task engagement, and cannot be explained, for  
159 instance, simply as an effect of adaptation to task experience. We performed a number of additional  
160 analyses to rule out any possibility that our findings could be explained merely as an effect of changing  
161 retinal input across task contexts, such as effects related to stimulus history or eye movements (see  
162 Supplementary Figs. 4-7). Taken together, these controls strengthen our interpretation that centrally-  
163 generated signals reflecting task engagement underlie the task-dependent  $r_{sc}$  structure we observed.

### 164 165 **Segregating fixed and task-dependent components of $r_{sc}$ structure**

166 Our dataset of  $r_{sc}$  measurements made in large, heterogeneous populations across diverse task  
167 contexts allowed us to directly estimate the  $r_{sc}$  structure that was fixed versus dynamically changing with  
168 task. To do this, we modeled the raw  $r_{sc}$  values using two structured components: 1) a fixed  $r_{sc}$  matrix

169 describing the dependence of  $r_{sc}$  on pairwise orientation preference regardless of task, and 2) a task-  
170 dependent  $r_{sc}$  matrix capturing the dependence of  $r_{sc}$  on pairwise orientation preference *relative* to the task  
171 orientations. We used ridge regression to find the form of these two component matrices that best  
172 predicted the raw  $r_{sc}$  measurements. To reduce the number of regressors without constraining the form  
173 these two components could take, we parametrized the matrices as 8x8 grids of basis functions (see  
174 schematic in Fig. 3a and Methods).

175         This modeling approach allowed us to address two related questions. First, the form of the fitted  
176 components serves to identify the nature of the dynamic and fixed  $r_{sc}$  structure in the V1 population.  
177 Second, comparing models that included either or both components provides a quantitative test for the  
178 origin of the  $r_{sc}$  structure we observed. When we jointly fit both components to the data, the inferred task-  
179 dependent component (Fig. 3c) recapitulated the lattice-like structure we observed in the average data  
180 (Fig. 2e). The fixed component (Fig. 3d) was smaller in amplitude and, interestingly, appeared also to  
181 contain a weak lattice-like structure, offset by approximately 30°. This is likely due to the fact that we did  
182 not uniformly sample across all possible task contexts, with tasks discriminating orientations near 30°/120°  
183 being overrepresented (see Fig. 2b). Next, we compared reduced models in which only one of the two  
184 components was used. Strikingly, cross-validated model accuracy was increased when we removed the  
185 fixed component entirely, but reduced by about half when we removed the task-dependent component  
186 (Fig. 3b). This suggests that the dependence of  $r_{sc}$  on orientation preference in our data can be explained  
187 as a completely dynamic phenomenon, with no additional dependence that is invariant to the task. We  
188 found that that all of these modeling results could be replicated when the fixed and task-dependent  
189 components were parametrized in a different way (using a variable number of basis functions with  
190 locations fit to the data, instead of a fixed grid of basis functions; see Methods and Supplementary Fig. 8),  
191 suggesting the conclusions do not depend on the particular parametric assumptions that were made.

192         We were interested in the effect of task context on  $r_{sc}$  structure, so it made sense to focus on the  
193 dependence of  $r_{sc}$  on orientation preference. However,  $r_{sc}$  depends on a large number of factors irrelevant



194 to the present study, such as physical proximity between pairs and similarity in tuning along many  
195 stimulus dimensions apart from orientation<sup>3,22</sup>. This implies that a model that describes the dependency on  
196 orientation preference correctly will only explain a small fraction of the variance in  $r_{sc}$ . (This can be  
197 appreciated in Fig. 2d and f, where pairs with similar locations on the abscissa have substantial variation  
198 in  $r_{sc}$ .) To estimate this fraction, we assessed the accuracy with which we could predict individual  $r_{sc}$   
199 values from a smoothed matrix built with other pairs. This showed that, in principle, 3.6% of the variance  
200 is explainable, of which the majority was explained by the regression model above. We also found that,  
201 across cross-validation folds, the fitted model components were highly consistent (mean correlation of  
202 0.99), suggesting the inferred structure is robust to noise in the data despite the low absolute value of  
203 variance explained. Additionally, as we will discuss, the task-dependent pattern of  $r_{sc}$  we identify is likely  
204 to be critically important during performance of the task despite the low fraction of total variance in  $r_{sc}$  it  
205 explains. However, it is important to point out that our data cannot directly speak to the origin of  $r_{sc}$   
206 structure in V1 except as it varies as a function of preferred orientation.

207

### 208 **$R_{sc}$ structure during task performance reflects a single mode of variability**

209 In the modeling discussed so far, we aimed to describe a fixed and task-dependent component of  
210  $r_{sc}$  structure with as few assumptions as possible. Having established that the observed  $r_{sc}$  structure can be  
211 best described assuming it is entirely task-dependent, we next sought to identify a more parsimonious and  
212 intuitive description of this task-dependency. We started with the observation that the pattern we observed  
213 – increased correlation between pairs preferring the same task orientation and decreased correlation for  
214 pairs preferring opposing task orientations – would be consistent with feature-selective feedback which  
215 varied in its allocation from trial to trial between the two task-relevant orientations, as has been shown in  
216 recent theoretical studies<sup>29,34</sup>. To quantify this observation, we performed an eigendecomposition of the  
217 smoothed, average  $r_{sc}$  matrix (Fig. 4a). We found that it had a single eigenvalue significantly larger than

218 would be predicted by chance, consistent with the correlation structure being determined largely by a  
219 single mode. Moreover, the first eigenvector contained a peak and trough at the two discriminandum  
220 orientations, respectively, suggesting a mode of variability which increases the firing rate of neurons  
221 supporting one choice and decreases the firing rate of neurons supporting the other choice (Fig. 4b). To  
222 model this, we assumed all observed  $r_{sc}$  values could be predicted by a single eigenvector which we  
223 constrained to be the difference of two von Mises functions centered  $90^\circ$  apart with variable amplitude  
224 and width (see Fig. 4c). We found that this simpler model in fact performed better than the more complex  
225 regression model in predicting individual  $r_{sc}$  values, capturing about 80% of the explainable variance in  $r_{sc}$   
226 (see Fig. 4e). This suggests that the  $r_{sc}$  structure we observed in V1 could indeed be well described as the  
227 result of a single source of covariability that changed dynamically with the task.

228 We compared the “single eigenvector” model with another simple model that more closely  
229 reflected standard assumptions about  $r_{sc}$  structure in sensory brain areas. This model predicted that  $r_{sc}$   
230 depends only on the difference in preferred orientation between pairs of neurons regardless of task<sup>5,9,10</sup>  
231 (“limited-range correlations” yielding an  $r_{sc}$  matrix with a diagonal ridge) and would be consistent with  $r_{sc}$   
232 structure due to common afferent inputs. We modeled this dependence as a von Mises function of  
233 preferred orientation difference (Fig. 4d). This model performed much worse in predicting the observed  
234 set of  $r_{sc}$  values, in fact not exceeding chance performance (Fig. 4e). (This qualitative difference in model  
235 performance was replicated in both subjects individually; see Supplementary Fig. 2). Importantly, both of  
236 these simple models predict a dependence of  $r_{sc}$  on preferred orientation difference similar to what we  
237 found in the data (Fig. 2d) and has been observed previously<sup>8,20-23</sup> – however, in the case of the “single  
238 eigenvector” model, this is due to task-dependent changes in  $r_{sc}$  while for the “diagonal ridge” model,  
239 there is no effect of task context. Notably, we found that during the passive fixation blocks, the “diagonal  
240 ridge” model performed better (Supplementary Fig. 3c), quantitatively supporting the observation that the  
241 task-dependent correlations we observed require active task engagement.

242

### 243 **Effect of task-dependent $r_{sc}$ structure on neural coding**

244 We next sought to address the functional importance of the  $r_{sc}$  we observed on sensory coding.  
245 Many studies have shown that  $r_{sc}$  in sensory neurons can decrease the sensory information that can be  
246 decoded, particularly when  $r_{sc}$  resembles correlations due to task-related stimulus changes<sup>5,8-15</sup>. We  
247 estimated this task-related stimulus correlation as the product of the slopes of a pair’s mean response  
248 functions along the task axis (i.e. as a function of orientation signal strength; Fig. 5a)<sup>16</sup>, normalized by the  
249 product of the neuronal variances. When we plotted these values as a smooth, task-aligned matrix (Fig.  
250 5b), we observed a lattice-like pattern strikingly similar to the observed  $r_{sc}$  matrix (Fig. 2e). Confirming  
251 this similarity, the task-dependent component of  $r_{sc}$  structure identified by the regression model was

252 highly correlated on a pair-by-pair basis with the stimulus-induced correlations ( $r=0.61$ , Fig. 5c). This  
253 matches our earlier observation that  $r_{sc}$  structure was consistent with feedback that alternately targeted  
254 the task-relevant neuronal pools, which is similar to the effect of varying the stimulus along the axis  
255 defining the task.

256 Thus, the observed  $r_{sc}$  structure appears not to improve, but rather to degrade, the sensory  
257 representation. However, our results highlight a problem with this interpretation and any purely  
258 feedforward account of the functional role of  $r_{sc}$ . Namely,  $r_{sc}$  that is generated endogenously need not be  
259 problematic at all (e.g. if the decoder had access to those endogenous signals). Indeed, the propagation of  
260 feedback signals that are matched to the statistics of the relevant sensory stimuli may be an adaptive  
261 strategy for bringing prior knowledge to bear, as predicted by recent models of probabilistic perceptual  
262 inference<sup>28,29</sup>.  $R_{sc}$  resembling stimulus-induced correlations emerge in such models<sup>28</sup> as a consequence of  
263 the subject developing the appropriate priors about the task, yielding predictions that both match our  
264 empirical findings and offer a normative explanation.

265

## 266 **Relationship between $r_{sc}$ structure and perceptual choice**

267 Correlations between trial-to-trial variability of single neurons and choice<sup>35,36</sup> have been frequently  
268 observed throughout sensory cortex. Theoretical studies have emphasized that this suggests the presence  
269 of spike-count correlation with a particular structure<sup>17-19,36,37</sup>. After all, if many sensory neurons have  
270 variability that is correlated with choice, this implies that neurons supporting the same choice are  
271 themselves correlated. However, this could be compatible with either or both of two causal mechanisms:  
272 1) correlated fluctuations directly affect the choices a subject makes trial to trial (a feedforward source of  
273 choice-related activity); or 2) the correlated fluctuations reflect variation across trials in a feedback signal  
274 related to the upcoming choice (a feedback source). As we show, our detailed measures of  $r_{sc}$  structure  
275 during task performance can address this ongoing debate.

276 First, we reasoned that a signature of feedback related to the upcoming choice would be  $r_{sc}$   
277 structure in V1 whose magnitude depends systematically on variability in choice. Consistent with this  
278 prediction, we found that the amplitude of the  $r_{sc}$  structure was attenuated on high-signal trials relative to  
279 0% signal trials, in a manner which depended systematically on signal strength (Fig. 6a,b). However, this  
280 attenuation was modest, even at the highest signal level we analyzed (11% reduction), despite the highly  
281 uneven distribution of choices. This rules out the extreme scenario in which feedback perfectly reflects  
282 choice. Supporting this conclusion, we found that the  $r_{sc}$  structure, when calculated using only spikes from  
283 different 200-ms windows during the trial, showed a stable timecourse (after a precipitous drop at the first  
284 time point) and did not grow in amplitude with decision formation (Fig. 7). Taken together, these  
285 observations support the conclusion that the  $r_{sc}$  structure reflects variation in feedback signals only  
286 partially correlated with the subject's final choices. These could include a combination of bias, attention to  
287 orientation, prior beliefs, and/or a decision variable.

288 Next, we assumed standard feedforward pooling (i.e. linear readout weights applied to the sensory  
289 pool) to determine if the observed  $r_{sc}$  structure would be quantitatively consistent with the observed  
290 choice-related activity. To do this, we made use of recent theoretical work which analytically relates  $r_{sc}$   
291 structure, readout weights, and choice-related activity<sup>17</sup>. We calculated Choice Probability (CP), which  
292 quantifies the probability with which an ideal observer could correctly predict the subject's choices using  
293 just that neuron's responses<sup>35,36</sup>, for each recorded neuron. We found an average CP of 0.54 for task-  
294 relevant neurons, significantly above chance level (Fig. 8a) and similar in magnitude to another study  
295 using the same task<sup>31</sup>. We found that the  $r_{sc}$  structure we observed would be sufficient to produce a pattern  
296 of CP across the population consistent with the data (Fig. 8b,c), across a wide range of possible readout  
297 schemes (Supplementary Fig. 9). Next, we considered the contribution of the different inferred sources of  
298  $r_{sc}$  to CP. (For top-down sources of correlation this is equivalent to assuming that the sensory population is  
299 read out without taking into account the top-down signal.) This allows us to treat all sources of  $r_{sc}$   
300 equivalently, and compare them quantitatively. When we considered a population containing only the

301 “task-dependent” component of  $r_{sc}$  structure identified in the regression model (Fig. 3c), predicted CP was  
302 only slightly reduced. Assuming only the “fixed” component (Fig. 3d), however, drastically reduced  
303 predicted CP below what we observed (Fig. 8b,c). Thus, our data rule out the view that a significant  
304 component of CP merely reflects the feedforward effect of stochastic noise in the afferent sensory  
305 pathway. Instead, the main feedforward source of CP appears to depend on task-dependent changes in  $r_{sc}$   
306 structure that subsequently influence perceptual judgments.

307

## 308 **Discussion**

309 Spike-count correlations between sensory neurons have typically been described as reflecting noise  
310 that corrupts sensory encoding<sup>5,8-15</sup>. However, little is known about the origin of  $r_{sc}$ , and it may instead be  
311 due to changes over time in feedback signals. We addressed this by recording from populations of V1  
312 neurons using multi-electrode arrays while macaque subjects performed a set of orientation discrimination  
313 tasks. This approach allowed us to estimate the entire matrix describing the dependence of  $r_{sc}$  on pairwise  
314 orientation preference (Fig. 2), providing an unprecedentedly clear picture of  $r_{sc}$  structure in a behaving  
315 animal. By determining to what extent the  $r_{sc}$  matrix was fixed, and what extent it changed with task, we  
316 could infer the relative importance of feedforward and feedback pathways in generating it (Fig. 3). We  
317 found systematic and novel structure in the  $r_{sc}$  matrix that changed in a predictable manner with the task.  
318 Using multiple modeling approaches, we found that the fixed  $r_{sc}$  structure was much smaller than the task-  
319 dependent structure, so much so that we could not estimate a fixed component reliably. Remarkably, a  
320 single source of task-dependent feedback captured the pattern we observed (Fig. 4). This feedback input  
321 increased and decreased the firing rate of neurons tuned for the two task-relevant orientations in a push-  
322 pull manner.

323 Our results suggest the possibility that variability in feedback is a major source of  $r_{sc}$  structure in  
324 sensory cortex. The role of feedback may be even more pronounced in areas downstream of V1 which

325 typically show a greater degree of extra-sensory modulation<sup>31,38–40</sup>. At the same time, we cannot rule out a  
326 larger role of feedforward inputs in generating patterns of  $r_{sc}$  defined in different ways than those  
327 uncovered here. For example, because our measures of  $r_{sc}$  structure involved smoothing, we cannot rule  
328 out the possibility that the fine-grained structure of  $r_{sc}$  behaves in ways not captured by our analysis.

329 Our results are consistent with, and expand upon, a prior study that also measured task-dependent  
330 changes in  $r_{sc}$ <sup>27</sup>. In that study, single pairs of direction-selective MT neurons were recorded while subjects  
331 performed two direction discrimination tasks chosen by the experiments to probe the effect of task  
332 context: one in which the neurons contributed to the same choice (“same-pool condition”) and one in  
333 which they contributed to opposite choices (“opposite-pool condition”). This amounts to a selective sub-  
334 sampling of the  $r_{sc}$  structure. While this identified some degree of task-dependence, the implications  
335 remained unclear. By contrast, the present study involved recordings from large simultaneously recorded  
336 populations, which achieved much better coverage of the full  $r_{sc}$  structure. This revealed the detailed  
337 structure of the task-dependence and provided the basis for quantitative modeling and novel conclusions.  
338 For the purposes of comparison, we plotted our data in an analogous way to the prior study and found  
339 qualitatively similar results (Supplementary Fig. 10).

340 Consistent with several past studies<sup>30,41,42</sup>, we found evidence for choice-related feedback, as  
341 shown by the finding that correlated fluctuations in V1 are more pronounced on trials where the subject’s  
342 choices were more variable (Fig. 6). However, this effect was relatively weak, and we observed that task-  
343 dependent  $r_{sc}$  structure did not grow in amplitude with decision formation (Fig. 7), suggesting processes  
344 indirectly related to choice may be responsible for the feedback generating the correlations. More  
345 importantly, we found that the standard assumption that correlated fluctuations influence choice through  
346 feedforward pathways<sup>17–19,36,37</sup> predicted CP in the V1 population that matched the data (Fig. 8), the first  
347 empirical test of the theoretical relationship between  $r_{sc}$  in sensory neurons, CP, and readout<sup>17</sup>. However,  
348 the  $r_{sc}$  structure responsible changed with the task, demonstrating that it does not simply reflect afferent  
349 noise. Taken together, our results instead favor the notion that choice-related activity comes about through

350 self-reinforcing loops of reciprocal connectivity between cortical areas, as has also been suggested by  
351 other studies<sup>29,42,43</sup>.

352 The task-dependent modulation of  $r_{sc}$  we observed did not appear to be beneficial to task  
353 performance (Fig. 5), at least not in the manner this has typically been examined (i.e. feedforward  
354 decoding of the sensory population alone). Instead, the inferred feedback signals appeared to mimic task-  
355 relevant stimulus changes, confounding the choices of an observer using only the sensory population.  
356 However, because the correlations reflect downstream computations, they need to not be limiting in this  
357 way to the subject. Thus our results highlight the fundamental insufficiency of considering the theoretical  
358 implications of  $r_{sc}$  in terms of purely feedforward frameworks, as almost all such studies have done to  
359 date.

360 The inferred source of task-dependent feedback resembles previous reports about the effects of  
361 feature-based attention on visual cortical neurons<sup>34,44</sup>. Feature-based attention enhances the firing rate of  
362 neurons tuned for the attended stimulus feature, and decreases the firing rate of neurons tuned for  
363 unattended stimulus features. One possibility is that our task engages feature-based attention which varies  
364 over time in its allocation between the two task-relevant orientations. This does not appear to provide an  
365 adaptive increase in the amount of relevant stimulus information encoded, contrary to traditional  
366 descriptions of attention<sup>45,46</sup>. However, as discussed above, once a top-down contribution to correlations is  
367 recognized, it is not possible to infer the amount of sensory information available to a decoder from the  
368 activity of a population of sensory neurons alone.

369 Our findings thus emphasize the need for new normative models that predict context-dependent  
370 feedback during perceptual processing. Currently, models based on hierarchical probabilistic  
371 inference<sup>28,29,47</sup> do predict such feedback signals, and account for many of our experimental findings. This  
372 work builds on the longstanding idea that the goal of a perceptual system is to generate valid inferences  
373 about the structure of the outside world, rather than to faithfully represent sensory input<sup>48,49</sup>. This requires



374 combining sensory input with prior beliefs, both of which can introduce correlated variability. During  
375 perceptual decision making, correlations resembling those induced by the stimulus naturally emerge as a  
376 consequence of the subject acquiring the appropriate prior beliefs about the structure of the sensory  
377 environment<sup>28</sup>. Clearly, further development of this and other models of perceptual processing are needed  
378 to generate quantitative predictions which can be further tested empirically.

379

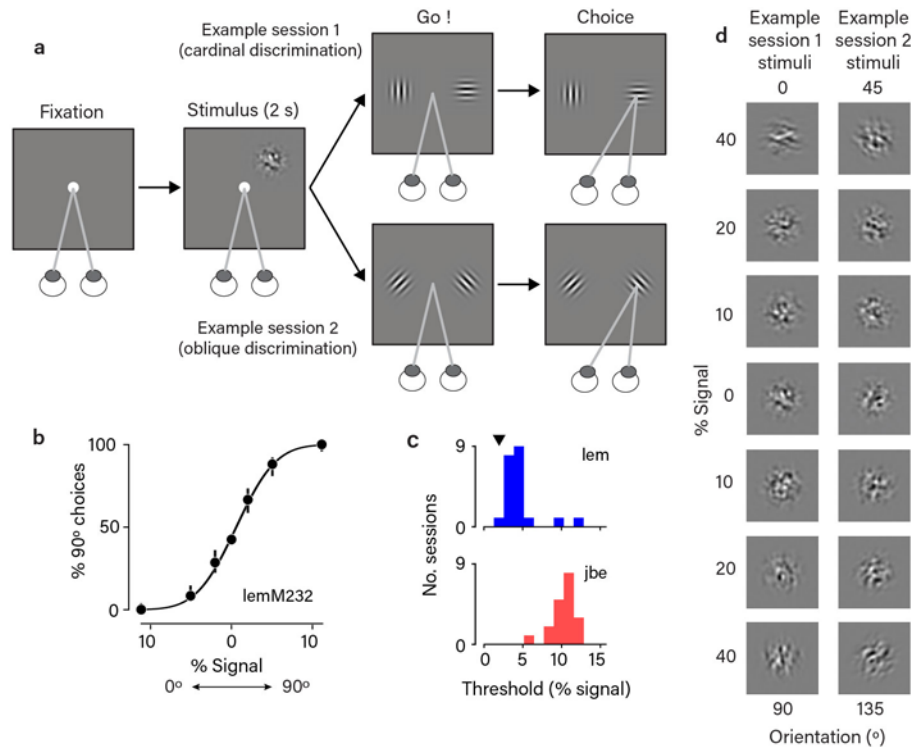

380

381 **Figure 1. Orthogonal orientation discrimination task.** **a.** Schematic illustration of the task. Two  
382 example task contexts shown (cardinal and oblique discriminations). The task context was fixed in a given  
383 recording session, but varied across sessions. **b.** Psychometric function for monkey 'lem', example  
384 session, n=1,354 trials. Black curve is a probit fit, and error bars are 95% confidence intervals around the  
385 mean (black points). **c.** Histograms showing the distribution of psychometric thresholds across sessions  
386 for the two subjects. Threshold is defined as the signal level eliciting 75% correct performance. Black  
387 triangle indicates the threshold corresponding to the example session in (b). **d.** Example single stimulus  
388 frames corresponding to the two example task contexts in (a). The stimuli consisted of dynamic, white  
389 noise filtered in the Fourier domain for orientation (see Methods). The filter was centered on one of the  
390 two task orientations and its bandwidth determined signal strength.

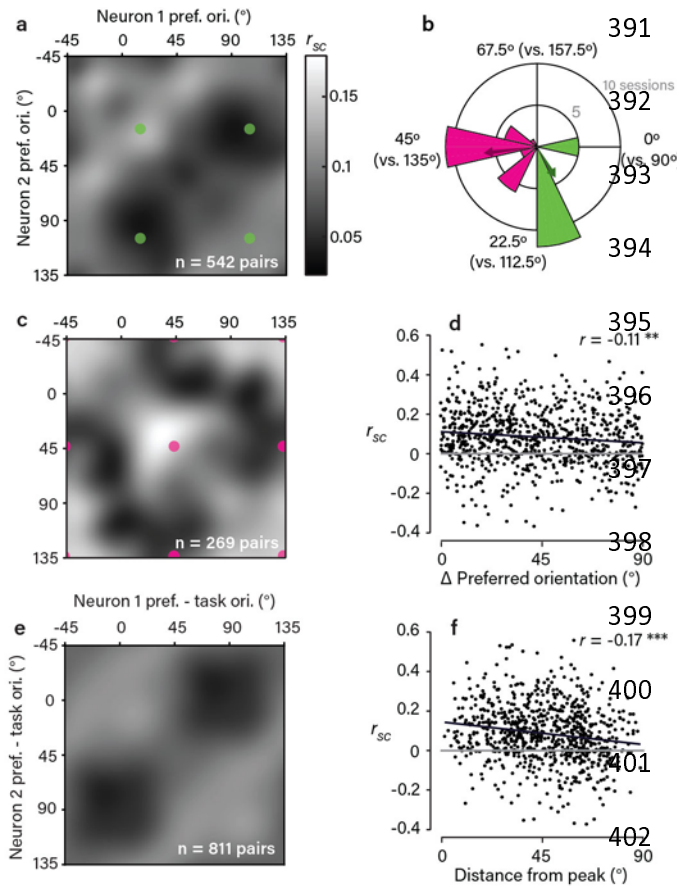

**Figure 2.  $R_{sc}$  structure in V1 depends**

**systematically on task context. a,c.** Observed  $r_{sc}$  matrices for the two subsets of sessions grouped by task context, as indicated in (b). The matrices were obtained by pooling the set of  $r_{sc}$  measurements made within each subset and applying a von Mises smoothing kernel (approximating a 2D wrapped Gaussian with  $15^\circ$  s.d.). Colored dots correspond to pairs preferring the same or opposing task orientations. **b.** Polar histogram shows the distribution of task contexts used across sessions, with color indicating the division into two subsets.

403 Note that the period is  $90^\circ$  because of the orthogonality of the discriminanda. Colored arrows indicate the  
 404 mean task context associated with each subset. **d.** Scatter plot showing a weak, but significant,  
 405 dependence of  $r_{sc}$  on the difference in preferred orientation of neuronal pairs ( $p=9*10^{-4}$ , bootstrap test,  
 406 one-sided). Black line is (type II) regression line and grey line corresponds to  $r_{sc}=0$ . **e.** Average  $r_{sc}$  matrix  
 407 observed across all session, shown in a task-aligned coordinate frame. Each pair's preferred orientations  
 408 are expressed relative to the task orientations (defined as  $0^\circ$  and  $90^\circ$ ). Color scale as in (a). **f.** Scatter plot  
 409 showing a significant dependence of  $r_{sc}$  on distance from the peak ( $0^\circ/0^\circ$  or  $90^\circ/90^\circ$ ) in the matrix in (e).  
 410 This dependence was stronger than the dependence on difference in preferred orientation ( $r=-0.17$ ,  
 411  $p=1.63*10^{-6}$ , bootstrap test, one-sided), suggesting the task-aligned pattern we observed captures a more  
 412 important feature of  $r_{sc}$  structure. Black and grey lines as in (d).

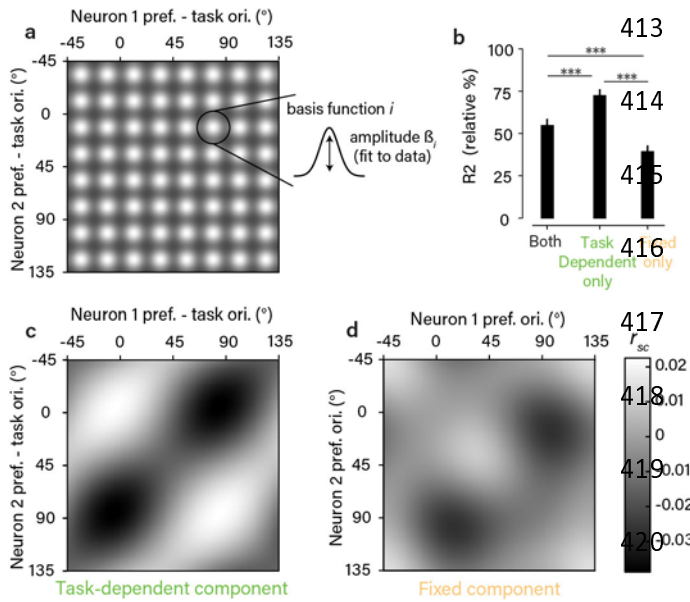

**Figure 3. Segregating fixed and task-dependent components of  $r_{sc}$  structure.** **a.** Schematic of the regression model used to estimate fixed and task-dependent components of  $r_{sc}$  structure. Each component was a matrix composed of a grid of 8x8 von Mises basis functions, with amplitudes fit to the observed  $r_{sc}$  measurements. **b.** Goodness-of-fit for the model that included both components and

421 for two reduced models that included only one of the two components. Values are expressed relative to an  
 422 estimate of the explainable variance in the data (see Methods). Error bars are +/- 1 SEM obtained from  
 423 repeated 50-fold cross-validation. Statistical differences in goodness-of-fit ( $p < 0.001$  in all cases) were  
 424 based on a one-sided test obtained in the same way. **c,d.** Estimated components from the combined model.  
 425 The amplitude of the task-dependent component (c) was considerably larger than the fixed component (d)  
 426 by a factor of 2.1 (computed using the variance across the fitted basis function amplitudes), and closely  
 427 resembled the lattice-like shape of the task-aligned, average  $r_{sc}$  matrix (Fig. 2e). Note that orientation  
 428 preferences for the task-dependent component are expressed relative to the task orientations. Mean  $r_{sc}$   
 429 values are close to 0 due to the inclusion of a model constant.

430

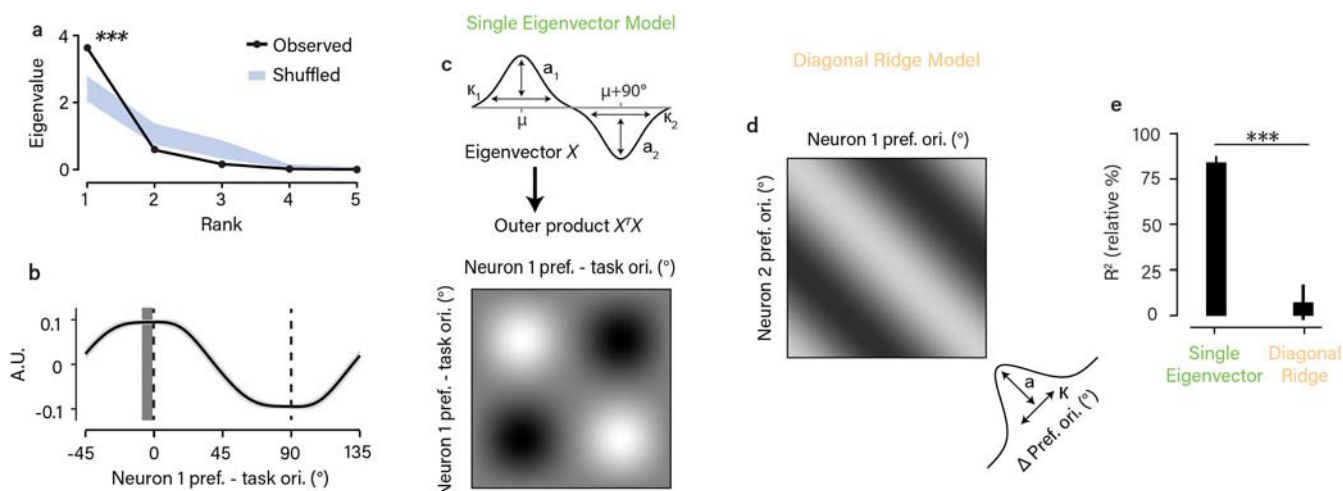

431

432 **Figure 4.  $R_{sc}$  structure during task performance reflects a single mode of variability. a.**

433 Eigenspectrum for the average, task-aligned  $r_{sc}$  matrix in Fig. 2e. The largest eigenvalue exceeded chance

434 ( $p < 0.001$ , permutation test, one-sided). The chance distribution (mean  $\pm$  1 SEM in blue) was determined

435 by adding a random offset to the preferred orientations of each of the 811 pairs (i.e. permuting each  $r_{sc}$

436 value along the diagonal). **b.** The eigenvector corresponding to the largest eigenvalue in (a). We first

437 removed the mean  $r_{sc}$  value from the matrices to ignore any flat eigenvectors. Error bar is  $\pm$  bootstrap

438 SEM. The dark gray vertical bar indicates the peak in the eigenvector  $\pm$  1 bootstrap SEM. This was not

439 significantly different from  $0^\circ$  ( $p = 0.078$ , bootstrap test, one-sided), indicating close alignment with the

440 task. **c.** Schematic of “single eigenvector” model, in which  $r_{sc}$  structure is described as the outer product of

441 a vector parameterized as the difference between two von Mises functions  $90^\circ$  apart. **d.** Schematic of the

442 “diagonal ridge” model in which  $r_{sc}$  structure depended only on the difference in preferred orientations,

443 independent of task. This dependence was modeled as a von Mises function centered on zero. **e.**

444 Goodness-of-fit for the models in (c) and (d), calculated as normalized % variance explained, as in Fig. 3.

445 Error bars around the mean and statistical comparison between models obtained through repeated 50-fold

446 cross-validation of the set of 811 pairs.

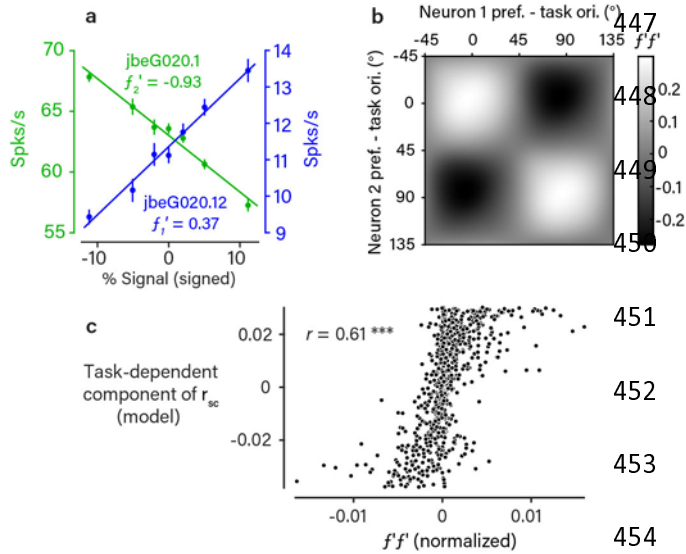

**Figure 5.  $R_{sc}$  structure matches effect of task-**

**related stimulus variability. a.** Responses (mean  $\pm$  1 SEM,  $n=1,049$  trials) to the stimuli used in the task at various signal strengths for two example

neurons. For the purposes of illustration, the two

task orientations are simply labeled positive and

negative. This pair was typical in that the response

functions ( $f_1$  and  $f_2$ ) are approximately linear over

455 the range of signal strengths used. For this reason, we calculated the response correlation introduced by

456 tuning similarity as the normalized product of the derivatives  $f_1'f_2'$  <sup>16</sup>. **b.** The matrix of  $f_1'f_2'$  values, as a

457 function of task-aligned pairwise orientation preference, obtained using kernel smoothing as in Fig. 2. We

458 observed a pattern that was very similar to the structure of  $r_{sc}$  we observed during task performance (Fig.

459 2e). **c.** Scatter plot of the task-dependent (putatively top-down) component of  $r_{sc}$  (Fig. 3c) against

460 normalized  $f_1'f_2'$  values for each recorded neuronal pair. The two were highly correlated across the

461 population (Pearson's  $r=0.62$ ,  $p<0.001$ , bootstrap test, one-sided).

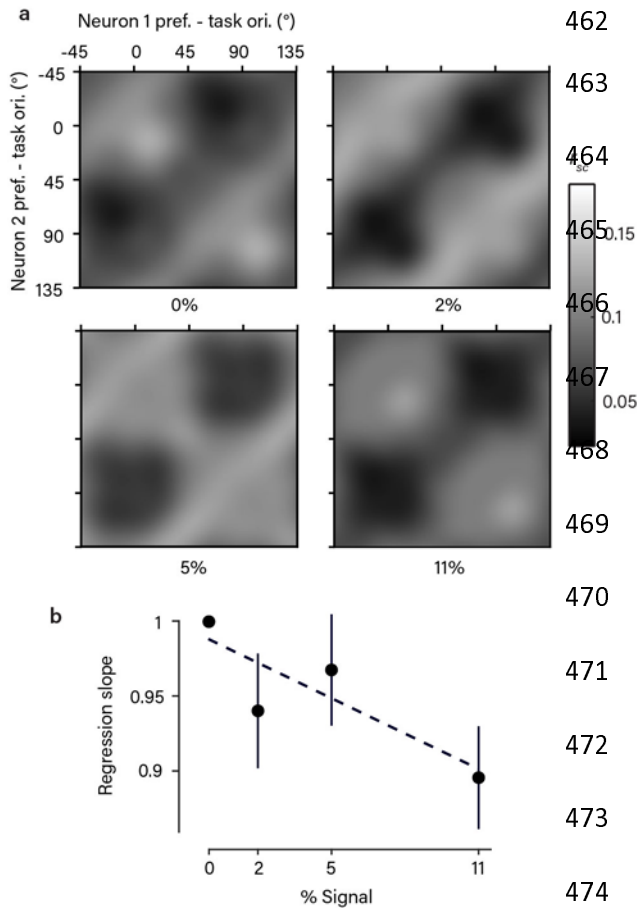

462 **Figure 6.  $R_{sc}$  structure depends on variability in**

463 **choice. a.** The average, task-aligned  $r_{sc}$  matrix (as in

464 Fig. 2e), shown separately for each stimulus strength.

465 Note that 0% signal trials involved statistically

466 identical stimuli across all task contexts. A

467 qualitatively similar structure was apparent at non-

468 zero signal levels. (Spike counts were z-scored to

469 eliminate the effect of stimulus drive; see Methods).

470 **b.** Scatter plot showing the slope of a regression line

471 comparing the  $r_{sc}$  values measured at each signal level

472 against the  $r_{sc}$  values measured at the 0% signal level.

473 This quantity indicates the degree of attenuation of the

474  $r_{sc}$  structure at a given signal level. We observed a weak but significant negative correlation (Pearson's  $r$ ,

475  $p=0.038$ , bootstrap test, one-sided) with signal strength (error bars are  $\pm 1$  bootstrap SEM around the

476 mean of the 811 pairs), implying the  $r_{sc}$  structure is attenuated on high-signal trials, when there was also

477 less variability in choice. Dotted line is fitted regression line.

478

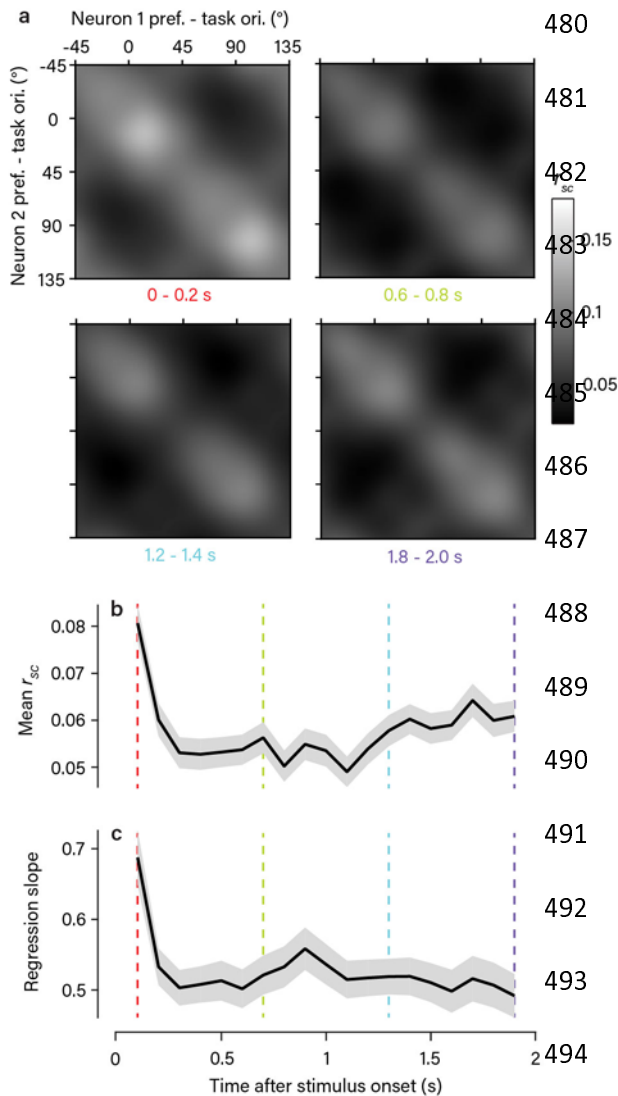

**Figure 7. Temporal dynamics of  $r_{sc}$  structure.** **a.** The average, task-aligned  $r_{sc}$  matrix (as in Fig. 2e) obtained using spike counts from 200-ms windows during the stimulus presentation. A similar structure was present at all time points (4 examples shown). **b-c.** Plots showing the temporal dynamics of two statistical measures of the observed  $r_{sc}$  structure (mean  $\pm$  1 bootstrap SEM). The colored lines indicate the example time points shown in (a). The population mean  $r_{sc}$  value (b) showed a sharp drop shortly after stimulus onset, as seen in other studies<sup>50</sup>, and then a gradual recovery over the course of the trial. The amplitude of the  $r_{sc}$  structure, quantified using the slope of the regression line of  $r_{sc}$  obtained in each 200-ms window against  $r_{sc}$  obtained from trial-length spike counts, is in (c). Apart from an increase at

495 the first time point, likely due to the onset of the visual stimulus, this showed no significant modulation  
496 over the course of the trial. Note that values are all significantly less than 1 because smaller counting  
497 windows introduced a source of uncorrelated noise across trials.

498



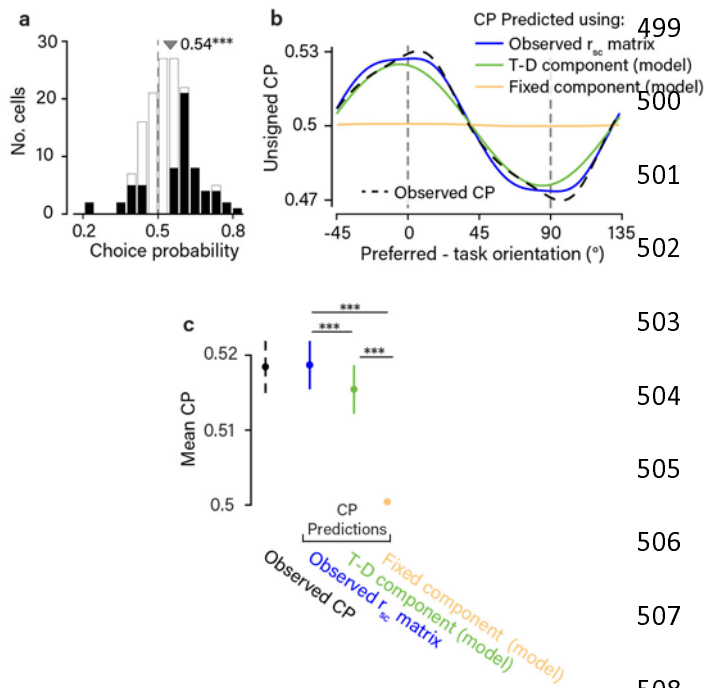

**Figure 8. The task-dependent component of  $r_{sc}$  structure accounts for choice-related**

**activity. a.** Histogram of observed CPs, from the subset of neurons ( $n=144$ ) significantly preferring one of the two task orientations ( $d \square > 0.9$  at highest signal level). Mean CP of 0.54 exceeded chance ( $p < 0.001$ , bootstrap test using cell resampling, one-sided). CPs that were individually significant ( $p < 0.05$ , bootstrap test using trial resampling, one-sided) are shown in

black. **b.** We tested the known analytical relationship between spike-count correlations, readout weights, and CPs, under the assumption of a linear decoder applied to a population of sensory neurons<sup>17</sup> (see Methods). Here CP is defined as a continuous function of task-aligned preferred orientation, analogous to our description of the  $r_{sc}$  matrix in Fig. 2e. The dashed black line shows the profile of CP observed across preferred orientations, after smoothing with a von Mises kernel approximating a wrapped Gaussian with  $10^\circ$  s.d. We applied a fixed sign convention to the CP values across all neurons, equivalent to arbitrarily calling the  $0^\circ$ -choice the preferred one. The predicted CP profiles (solid lines) show the CP elicited by reading out a sensory population with different  $r_{sc}$  structures. Readout weights across orientations were unobserved and the profiles shown are averages of a large set generated from different assumed readout weight profiles (see Methods). **c.** Mean CP (using the traditional sign convention) associated with the profiles in (b),  $\pm 1$  bootstrap SEM obtained by cell resampling ( $n=811$  neurons). Note that the mean CP shown here is different to the one shown in (a) because all neurons are included, regardless of their orientation preference.

522

523 **Acknowledgements**

524 We thank Bob Wurtz and James McFarland for useful discussions; Richard Krauzlis, Bevil Conway, and  
525 Ali Ghazizadeh for comments on an earlier version of the manuscript; and Beth Nagy, Irina Bunea, and  
526 Denise Parker for veterinary care.

527

528 **Author Contribution**

529 A.G.B. and B.G.C. conceived and designed the experiments. A.G.B. performed the experiments and all  
530 aspects of the analysis. A.G.B. and B.G.C. wrote the paper. R.H. advised and assisted with the data  
531 analysis and the paper. B.G.C. advised at all stages.

532

533 **Competing Financial Interests**

534 The authors declare no competing financial interests.

535

536

- 537 1. Tomko, G. J. & Crapper, D. R. Neuronal variability: non-stationary responses to identical visual  
538 stimuli. *Brain Res.* **79**, 405–418 (1974).
- 539 2. Henry, G. H., Bishop, P. O., Tupper, R. M. & Dreher, B. Orientation specificity and response  
540 variability of cells in the striate cortex. *Vision Res.* **13**, 1771–1779 (1973).
- 541 3. Cohen, M. R. & Kohn, A. Measuring and interpreting neuronal correlations. *Nat. Neurosci.* **14**,  
542 811–9 (2011).
- 543 4. Shadlen, M. N. & Newsome, W. T. The variable discharge of cortical neurons: implications for  
544 connectivity, computation, and information coding. *J. Neurosci.* **18**, 3870–3896 (1998).
- 545 5. Sompolinsky, H., Yoon, H., Kang, K. & Shamir, M. Population coding in neuronal systems with  
546 correlated noise. *Phys. Rev. E* **64**, 51904 (2001).
- 547 6. Gu, Y., Angelaki, D. E. & DeAngelis, G. C. Contribution of correlated noise and selective  
548 decoding to choice probability measurements in extrastriate visual cortex. *Elife* **3**, 1–19 (2014).
- 549 7. Liu, S., Dickman, J. D., Newlands, S. D., DeAngelis, G. C. & Angelaki, D. E. Reduced choice-  
550 related activity and correlated noise accompany perceptual deficits following unilateral vestibular  
551 lesion. *Proc. Natl. Acad. Sci. U. S. A.* **110**, 17999–8004 (2013).
- 552 8. Zohary, E., Shadlen, M. N. & Newsome, W. T. Correlated neuronal discharge rate and its  
553 implications for psychophysical performance. *Nature* **370**, 140–143 (1994).
- 554 9. Abbott, L. F. & Dayan, P. The effect of correlated variability on the accuracy of a population code.  
555 *Neural Comput.* **11**, 91–101 (1999).
- 556 10. Snippe, H. & Koenderink, J. Information in channel-coded systems: correlated receivers. *Biol.*  
557 *Cybern.* **190**, 183–190 (1992).
- 558 11. Averbeck, B. B., Latham, P. E. & Pouget, A. Neural correlations, population coding and  
559 computation. *Nat. Rev. Neurosci.* **7**, 358–66 (2006).
- 560 12. Cohen, M. R. & Maunsell, J. H. R. Attention improves performance primarily by reducing  
561 interneuronal correlations. *Nat. Neurosci.* **12**, 1594–600 (2009).
- 562 13. Graf, A. B. a, Kohn, A., Jazayeri, M. & Movshon, J. A. Decoding the activity of neuronal  
563 populations in macaque primary visual cortex. *Nat. Neurosci.* **14**, 239–45 (2011).
- 564 14. Mitchell, J. F., Sundberg, K. a & Reynolds, J. H. Spatial attention decorrelates intrinsic activity  
565 fluctuations in macaque area V4. *Neuron* **63**, 879–88 (2009).
- 566 15. Johnson, K. O. Sensory discrimination: decision process. *J. Neurophysiol.* **43**, 1771–1792 (1980).
- 567 16. Moreno-Bote, R. *et al.* Information-limiting correlations. *Nat. Neurosci.* **17**, 1410–1417 (2014).
- 568 17. Haefner, R. M., Gerwinn, S., Macke, J. H. & Bethge, M. Inferring decoding strategies from choice  
569 probabilities in the presence of correlated variability. *Nat. Neurosci.* **16**, 235–42 (2013).
- 570 18. Nienborg, H. & Cumming, B. G. Correlations between the activity of sensory neurons and  
571 behavior: how much do they tell us about a neuron’s causality? *Curr. Opin. Neurobiol.* **20**, 376–  
572 381 (2010).
- 573 19. Shadlen, M. N., Britten, K. H., Newsome, W. T. & Movshon, J. A. A computational analysis of the  
574 relationship between neuronal and behavioral responses to visual motion. *J. Neurosci.* **16**, 1486–  
575 510 (1996).

- 576 20. Bair, W., Zohary, E. & Newsome, W. T. Correlated firing in macaque visual area MT: time scales  
577 and relationship to behavior. *J. Neurosci.* **21**, 1676–97 (2001).
- 578 21. Lee, D., Port, N. L., Kruse, W. & Georgopoulos, a P. Variability and correlated noise in the  
579 discharge of neurons in motor and parietal areas of the primate cortex. *J. Neurosci.* **18**, 1161–70  
580 (1998).
- 581 22. Smith, M. A. & Kohn, A. Spatial and temporal scales of neuronal correlation in primary visual  
582 cortex. *J. Neurosci.* **28**, 12591–603 (2008).
- 583 23. Kohn, A. & Smith, M. a. Stimulus dependence of neuronal correlation in primary visual cortex of  
584 the macaque. *J. Neurosci.* **25**, 3661–73 (2005).
- 585 24. Callaway, E. M. Feedforward, feedback and inhibitory connections in primate visual cortex. *Neural*  
586 *Netw.* **17**, 625–32 (2004).
- 587 25. Sillito, A. M., Cudeiro, J. & Jones, H. E. Always returning: feedback and sensory processing in  
588 visual cortex and thalamus. *Trends Neurosci.* **29**, 307–16 (2006).
- 589 26. Ruff, D. A. & Cohen, M. R. Attention can either increase or decrease spike count correlations in  
590 visual cortex. *Nat. Neurosci.* **17**, 1591–7 (2014).
- 591 27. Cohen, M. R. & Newsome, W. T. Context-dependent changes in functional circuitry in visual area  
592 MT. *Neuron* **60**, 162–73 (2008).
- 593 28. Lange, R. D. & Haefner, R. M. Inferring the brain's internal model from sensory responses in a  
594 probabilistic inference framework. *bioRxiv* (2016).
- 595 29. Haefner, R. M., Berkes, P. & Fiser, J. Perceptual Decision-Making as Probabilistic Inference by  
596 Neural Sampling. *Neuron* **90**, 649–660 (2016).
- 597 30. Cumming, B. G. & Nienborg, H. Feedforward and feedback sources of choice probability in neural  
598 population responses. *Curr. Opin. Neurobiol.* **37**, 126–132 (2016).
- 599 31. Nienborg, H. & Cumming, B. G. Decision-Related Activity in Sensory Neurons May Depend on  
600 the Columnar Architecture of Cerebral Cortex. *J. Neurosci.* **34**, 3579–3585 (2014).
- 601 32. Nienborg, H. & Cumming, B. G. Psychophysically measured task strategy for disparity  
602 discrimination is reflected in V2 neurons. *Nat. Neurosci.* **10**, 1608–1614 (2007).
- 603 33. Ahumada Jr, A. J. Perceptual classification images from Vernier acuity masked by noise. in  
604 *Perception ECVF abstract* **25**, 0 (Pion Ltd, 1996).
- 605 34. Ecker, A. S., Denfield, G. H., Bethge, M. & Tolias, A. S. On the Structure of Neuronal Population  
606 Activity under Fluctuations in Attentional State. *J. Neurosci.* **36**, 1775–1789 (2016).
- 607 35. Britten, K. H., Newsome, W. T., Shadlen, M. N., Celebrini, S. & Movshon, J. A. A relationship  
608 between behavioral choice and the visual responses of neurons in macaque MT. *Vis. Neurosci.* **13**,  
609 87 (1996).
- 610 36. Crapse, T. B. & Basso, M. A. Insights into Decision-Making Using Choice Probability. *J.*  
611 *Neurophysiol.* jn.00335.2015 (2015). doi:10.1152/jn.00335.2015
- 612 37. Nienborg, H., Cohen, M. R. & Cumming, B. G. Decision-Related Activity in Sensory Neurons:  
613 Correlations Among Neurons and with Behavior. *Annu. Rev. Neurosci.* **35**, 463–483 (2012).
- 614 38. Moran, J. & Desimone, R. Selective attention gates visual processing in the extrastriate cortex.

- 615            *Science* (80-. ). **229**, 782–784 (1985).
- 616    39.    McAdams, C. J. & Maunsell, J. H. Effects of attention on orientation-tuning functions of single  
617            neurons in macaque cortical area V4. *J. Neurosci.* **19**, 431–41 (1999).
- 618    40.    Goris, R. L. T., Movshon, J. A. & Simoncelli, E. P. Partitioning neuronal variability. *Nat. Neurosci.*  
619            **17**, 858–865 (2014).
- 620    41.    Nienborg, H. & Cumming, B. G. Decision-related activity in sensory neurons reflects more than a  
621            neuron’s causal effect. *Nature* **459**, 89–92 (2009).
- 622    42.    Wimmer, K. *et al.* Sensory integration dynamics in a hierarchical network explains choice  
623            probabilities in cortical area MT. *Nat. Commun.* **6**, 6177 (2015).
- 624    43.    Kwon, S. E., Yang, H., Minamisawa, G. & O’Connor, D. H. Sensory and decision-related activity  
625            propagate in a cortical feedback loop during touch perception. *Nat. Neurosci.* **19**, (2016).
- 626    44.    Treue, S. & Martínez Trujillo, J. C. Feature-based attention influences motion processing gain in  
627            macaque visual cortex. *Nature* **399**, 575–9 (1999).
- 628    45.    James, W. *The Principles of Psychology*. (H Holt, 1890).
- 629    46.    Posner, M. I. & Petersen, S. E. The attention system of the human brain. *Annu. Rev. Neurosci.* 25–  
630            42 (1990).
- 631    47.    Tajima, C. I. *et al.* Population Code Dynamics in Categorical Perception. *Sci. Rep.* **6**, 22536 (2016).
- 632    48.    Knill, D. C. & Richards, W. *Perception as Bayesian Inference*. (Cambridge University Press,  
633            1996).
- 634    49.    Von Helmholtz, H. *Handbuch der physiologischen Optik.* **9**, (Voss, 1867).
- 635    50.    Churchland, M. M. *et al.* Stimulus onset quenches neural variability: a widespread cortical  
636            phenomenon. *Nat. Neurosci.* **13**, 369–78 (2010).
- 637

638 **Methods**

639 **Electrophysiology**

640 We recorded extracellular spiking activity from populations of V1 neurons in two male, awake,  
641 head-fixed rhesus monkeys (*Macaca mulatta*). For the majority of the recordings, monkey ‘lem’ was 14  
642 while monkey ‘jbe’ was 16 years old, before which time they had each experienced extensive behavioral  
643 training, including on other behavioral paradigms for monkey ‘lem’. Monkey ‘lem’ could not be pair  
644 housed due to antisocial behavior. Both monkeys were implanted with a head post and scleral search coils  
645 under general anaesthesia<sup>51</sup>. In monkey ‘lem’, a recording chamber was implanted over a craniotomy  
646 above the right occipital operculum, as described previously<sup>52</sup>, by which we introduced linear  
647 microelectrode arrays (U- and V-probes, Plexon; 24-contacts, 50 or 60  $\mu\text{m}$  spacing) at an angle  
648 approximately perpendicular to the cortical surface with a custom micro-drive. We positioned the linear  
649 arrays so that we roughly spanned the cortical sheet, as confirmed with current-source density analysis,  
650 and removed them after each recording session. In monkey ‘jbe’, a planar “Utah” array (Blackrock  
651 Microsystems; 96 electrodes 1mm in length inserted to target supragranular layers, 400  $\mu\text{m}$  spacing) was  
652 chronically implanted, also over the right occipital operculum. All procedures were performed in  
653 accordance with the U.S. Public Health Service Policy on the humane care and use of laboratory animals  
654 and all protocols were approved by the National Eye Institute Animal Care and Use Committee.

655 Broadband signals were digitized at 30 or 40 kHz and stored to disk. Spike sorting was performed  
656 offline using custom software in MATLAB<sup>®</sup>. First, spikes were detected using a voltage threshold applied  
657 to high-pass filtered signals. Next, triggered waveforms were projected into spaces defined either by  
658 principal components or similarity to a template. Clusters boundaries were finally estimated with a  
659 Gaussian mixture model, and then rigorously verified and adjusted by hand when needed. In the linear  
660 array recordings, spike sorting yield and quality was substantially improved by treating sets of three or  
661 four neighboring contacts as “n-trodes”. As this was not possible with the Utah array due to the greater  
662 interelectrode spacing, we excluded pairs of neurons recorded on the same electrode to avoid

663 contamination by misclassification. Neurons from separate recording sessions were treated as  
664 independent. To reduce the possibility that a single neuron from the Utah array contributed to two  
665 datasets, we included only sessions that were separated by at least 48 hours (with a median separation of 5  
666 days). We excluded from analysis those neurons whose mean evoked firing rate did not exceed 7  
667 spikes/second.

## 668 **Visual stimuli**

669 All stimuli were presented binocularly on two gamma-corrected cathode ray tube (CRT)  
670 monitors viewed through a mirror haploscope, at 85 or 100Hz. The monitors subtended  $24.1^\circ \times 19.3^\circ$  of  
671 visual angle (1280 x 1024 pixels). The stimuli presented during performance of the discrimination task  
672 consisted of bandpass filtered dynamic white noise, as described previously<sup>31</sup>. Briefly, stimuli were  
673 filtered in the Fourier domain with a polar-separable Gaussian. The peak spatial frequency was optimized  
674 for the recorded neuronal population (1 and 4 cpd medians for '*lem*' and '*jbe*', respectively) while the  
675 peak orientation could take one of two orthogonal values the animal had to discriminate in a given session.  
676 The angular s.d. of the filter modulated the orientation bandwidth and was varied trial to trial. A 2D  
677 Gaussian contrast envelope was applied to the stimulus so that its spatial extent was as small as possible  
678 while still covering the minimum response fields of the neuronal populations being recorded. The median  
679 envelope s.d. was 0.6 degrees for both animals. The median stimulus eccentricity was 5.4 degrees for  
680 '*lem*' and 0.5 degrees for '*jbe*'. In Fig. 1, we quantify orientation bandwidth as % signal strength. This  
681 was calculated as  $100 * R$ , where  $R$  is the length of the resultant vector associated with the angular  
682 component of the stimulus filter. To perform psychophysical reverse correlation (PRC) for orientation  
683 (Supplementary Fig. 1), we summarized the orientation energy of the stimulus on each trial as the radial  
684 sum of its 2D amplitude spectrum (averaged across frames) to remove information about spatial frequency  
685 and phase.

686 We estimated neuronal orientation preferences in separate blocks of trials, using 420-ms  
687 presentations of the following types of stimuli, presented at a range of orientations: 1) an orientation  
688 narrowband version of the stimulus described above ( $10^\circ$  angular s.d.); 2) sinusoidal gratings; and 3)  
689 circular patches of dynamic 1D noise patterns (random lines). The preferred orientation of a neuron was  
690 calculated as the circular mean of its orientation tuning curve. For each neuron, from among the set of  
691 tuning curves elicited by the different stimulus types described above, we chose as the final estimate of  
692 preferred orientation the one with the smallest standard error, obtained by resampling trials. We excluded  
693 from further analysis all neurons where this exceeded  $5^\circ$ . On a subset of sessions, we also used these  
694 orientation-tuning blocks to present examples of the 0%-signal orientation-filtered noise stimuli. These  
695 were presented at the same location and size as during task performance, allowing us to calculate  $r_{sc}$   
696 structure in the absence of task engagement but with identical retinal input.

### 697 **Orthogonal orientation discrimination task**

698 The animals performed a coarse orientation discrimination task using the orientation-filtered noise  
699 stimuli, as described previously<sup>31</sup>. To initiate a trial, the subject had to acquire a central fixation square.  
700 After a delay of 50 ms, the stimulus appeared for a fixed duration of 2 seconds. The trial was aborted if  
701 the subject broke fixation at any point during the stimulus presentation, defined as either 1) making a  
702 microsaccade covering a distance greater than a predefined threshold (typically  $0.5^\circ$ ) or 2) a deviation in  
703 mean eye position from the center of the fixation point of more than a predefined threshold, typically  $0.7^\circ$ .  
704 At the end of the stimulus presentation, two choice targets appeared. These were Gabor patches of 2-3° in  
705 spatial extent, oriented at each of the two discriminandum orientations. The locations of the choice targets  
706 depended on the task. For orientation pairs near horizontal and vertical ( $-22.5^\circ - +22.5^\circ$  and  $67.5^\circ -$   
707  $112.5^\circ$ ), the choice targets were positioned along the vertical meridian, at an eccentricity of about  $3^\circ$ , with  
708 the more vertically-oriented target appearing always in the upper hemifield. For orientation pairs near the  
709 obliques ( $22.5^\circ - 67.5^\circ$  and  $112.5^\circ - 157.5^\circ$ ), the choice targets were positioned along the horizontal  
710 meridian, at the same range of eccentricities, with the smaller of the two orientations always appearing in



711 the left hemifield. (We use the convention that horizontal is  $0^\circ$  and that orientation increases with  
712 clockwise rotation.) To penalize random guessing, the volume of liquid reward delivered after correct  
713 choices was doubled with each consecutive correct choice, up to a maximum of four times the initial  
714 amount. Since we were primarily interested in the effect of task engagement on neuronal activity, we  
715 applied a behavioral criterion to our data, excluding sessions where the subject's psychophysical threshold  
716 (defined as the signal level eliciting 75% correct performance) exceeded 14% signal.

717 To determine the influence on  $r_{sc}$  of random fluctuations in the stimulus introduced by the use of  
718 white noise, we used a double-pass experimental design<sup>53</sup> in which each exact stimulus sequence was  
719 presented on two separate trials. We calculated the stimulus-induced  $r_{sc}$  for each pair, as described below,  
720 after permuting the indices of the paired repeat trials for one neuron's trial sequence. This eliminated the  
721 temporal alignment of the two trial sequences, abolishing stimulus-independent covariability, while  
722 preserving the identity between the stimuli associated with the two trial sequences.

723 We attempted to use as wide a range of task contexts as possible over the course of data collection  
724 from both animals, but task contexts were not presented in a randomized way to the subjects, since  
725 performing a new task context required several days of retraining. Additionally, data collection and  
726 analysis was not performed blind to the experimental conditions – in particular, experimenters were aware  
727 what the instructed task context was. For further detailed information on experimental design and  
728 reagents, see the Life Sciences Reporting Summary included online.

## 729 **Spike-count correlation measurements**

730 Spike-count correlations were calculated as the Pearson correlation between spike counts, counted  
731 over the entire duration of the stimulus, with a 50-ms delay to account for the typical V1 response latency.  
732 Spike counts were first z-scored separately within each experimental block (typically a set of 100-200  
733 trials lasting about 10 minutes) and each stimulus condition. This removed correlations related to long-  
734 term firing rate nonstationarities and allowed us to combine trials at different signal levels without

735 introducing correlations related to similarity in stimulus preference. We used a balanced z-scoring method  
736 proposed recently to prevent bias related to differences in choice distributions across signal levels<sup>54</sup>. We  
737 excluded pairs that were not simultaneously isolated for at least 25 trials total. The median number of  
738 trials per pair during task performance was 752.

739 Despite the use of z-scoring, any influence of stimulus history on firing rates could in principle  
740 introduce a source of covariability that depended on the task context, since the set of stimuli used was not  
741 identical across task contexts (only the 0%-signal condition was identical). We ruled out this confound by  
742 adapting the z-scoring procedure described above to further remove any information about the preceding  
743 stimulus contained in the spike rate on the current trial. To do this, we z-scored spike counts separately  
744 within groups of trials for which the current stimulus *and* the stimulus on the preceding trial were the  
745 same. This produced identical results to those shown in the main analysis (Supplementary Fig. 5).

746 A main goal of the study was to measure how spike-count correlation varies with pairwise  
747 orientation. We illustrate this dependence in several figures as a smoothed function estimated from  
748 measures of  $r_{sc}$  combined across multiple recording sessions, which we then sampled discretely with  $1^\circ$   
749 resolution. The smoothed estimates were obtained using a bivariate von Mises smoothing kernel. A point  
750 in the correlation matrix  $\mathbf{C}$  was given as:

$$751 \quad \mathbf{C}(x, y) = \frac{\sum_{i=1}^n z_i K(x, y, \theta_i, \phi_i)}{\sum_{i=1}^n K(x, y, \theta_i, \phi_i)}, \text{ where } K(x, y, \theta_i, \phi_i) = e^{\kappa (\cos(\theta_i - x) + \cos(\phi_i - y))}, \quad (1)$$

752  $z_i$  is the  $i^{\text{th}}$   $r_{sc}$  measurement,  $\theta_i$  and  $\phi_i$  are the preferred orientations of the  $i^{\text{th}}$  pair, and  $\kappa$  is the von Mises  
753 width parameter. We set  $\kappa = 1.3\pi$ , yielding a smoothing kernel closely approximating a bivariate  
754 wrapped Gaussian with  $15^\circ$  s.d. (Note that this smoothing procedure was only performed to generate  
755 figures in the manuscript, and was not applied as a pre-processing step in any of the quantitative analyses.)  
756 In some cases, we expressed the  $r_{sc}$  matrix in a task-aligned coordinate frame (e.g. Fig. 2e), for which the  
757 preferred orientations of the  $i^{\text{th}}$  pair relative to the task orientations were used for  $\theta_i$  and  $\phi_i$ . Since there  
758 were always two orthogonal task orientations, we averaged across both possible alignments, such that

759  $\mathbf{C}(x, y) = \mathbf{C}(x + 90^\circ, y + 90^\circ)$ . All angular quantities were doubled for the calculations, as orientation  
760 has a period of  $180^\circ$ . To generate the kernel-smoothed profile of CP (Fig. 8), we used a one-dimensional  
761 equivalent of the procedure above, in which preferred orientations were parameterized only by a single  
762 parameter.

763 We considered using covariance instead of correlation to measure the covariability of neuronal  
764 pairs. However, a key advantage of correlation is that it is insensitive to the variance of the spike counts.  
765 By contrast, measures that do not normalize for spike-count variance will effectively overweight more  
766 variable pairs in any population analysis. In addition, using spike-count correlation allowed us to combine  
767 z-scored counts across stimulus conditions. This substantially increased the signal-to-noise ratio of our  
768 measurements. As a confirmation that this approach yielded results that generalize, we measured the  
769 average, task-aligned spike-count covariance matrix, using the same approach as we used to generate the  
770  $r_{sc}$  matrix in Fig. 2e. To estimate the spike-count covariance between a given pair of neurons without  
771 including an effect of common stimulus drive, we used an average of the covariance values measured  
772 separately for each stimulus condition, weighted by number of trials. We found that the pattern in the  
773 spike-count covariance matrix was closely similar to the  $r_{sc}$  matrix (Supplementary Fig. 11). This  
774 confirms that our main results are not dependent on the use of  $r_{sc}$  measured with normalized spike counts.

## 775 **Regression model**

776 We used a multilinear regression model to identify fixed and task-dependent components of the  
777 structured correlations we observed. We describe the set of observations (811 individual pairwise  $r_{sc}$   
778 measurements) in terms of a set of two underlying correlation structures: one defining  $r_{sc}$  as a function of  
779 pairwise preferred orientation alone (“fixed”) and the other defining  $r_{sc}$  as a function of pairwise preferred  
780 orientation relative to the task orientations (“task-dependent”). In order to provide a continuous and  
781 smooth description of the data, each component was parameterized as the sum of an array of  $n \times n$  evenly  
782 spaced basis functions. Each observation,  $y_i$ , was expressed as:

783 
$$y_i = x_i^{fixed} \cdot \beta^{fixed} + x_i^{task} \cdot \beta^{task} + c + \varepsilon_i \quad (2)$$

784  $x_i^{fixed}$  and  $x_i^{task}$  are length- $n^2$  vectors of loadings onto the basis functions, which were given by  
785 evaluating the basis functions at the location corresponding to the pairwise orientation preference of the  $i^{th}$   
786 pair.  $\beta^{fixed}$  and  $\beta^{task}$  are the length- $n^2$  vectors of amplitudes of the basis functions (coefficients to be fit),  
787  $c$  is a model constant, and  $\cdot$  is the element-wise product. For the basis functions, we used bivariate von  
788 Mises functions, with no correlation and equal width in both dimensions. Thus the  $k^{th}$  loading ( $x_i^{fixed}(k)$   
789 or  $x_i^{task}(k)$ ) was given by:

790 
$$x_i(k) = \frac{e^{\kappa(\cos(\theta_i - \mu_k^1) + \cos(\phi_i - \mu_k^2))} + e^{\kappa(\cos(\phi_i - \mu_k^1) + \cos(\theta_i - \mu_k^2))}}{Z} \quad (3)$$

791 where  $\theta_i$  and  $\phi_i$  are the preferred orientations of the  $i^{th}$  pair (relative to the task orientations in the case of  
792 the task-dependent loadings),  $\mu_k$  is a pair of orientations defining the location of the  $k^{th}$  basis function,  $Z$  is  
793 a normalization constant such that the sum of all loadings for observation  $i$  ( $x_i^{fixed} + x_i^{task}$ ) is 1, and  $\kappa$  is  
794 the basis function width. Two terms are needed to express the loadings because the data are correlations:  
795 the first term describes the upper triangular portion and the second describes the lower triangular portion.  
796 Again, angular quantities were doubled.  $\kappa$  acts as a smoothing hyperparameter. We found that arrays of  
797 8x8 were sufficient to describe the structure of the two components. It was sufficient only to fit the upper  
798 triangular portion of the array of basis functions. Thus, each component was described by 36 parameters  
799 (although the effective number of parameters is significantly less because of the basis function smoothness  
800 and the ridge penalty). We fit the model using ridge regression. The unique optimal solution could  
801 therefore be derived analytically as  $\hat{B} = (X^T X + \alpha I)^{-1} X^T Y$ , where  $X$  is the concatenated design matrix  
802 combining  $x^{fixed}$  and  $x^{task}$  and  $\alpha$  is the ridge parameter, which penalized the squared amplitude of the  
803 basis functions. The optimal values of the hyperparameters  $\alpha$  and  $\kappa$  were chosen under 50-fold cross-  
804 validation.

805 To ensure our results were not due to the particular way the above model was constructed, we  
806 compared them to those obtained using a conceptually similar regression model. In this alternative model,  
807 instead of a grid of basis functions with fixed locations, we allowed each component to be described as the  
808 sum of a variable number of von Mises basis functions with locations (as well as width and amplitude) fit  
809 to the data, again using least squares. This alternative model allowed, in principle, for fewer parameters  
810 and for fine details in the  $r_{sc}$  structure to be captured by allowing some basis functions to have small  
811 width. The relative contribution of the fixed and task-dependent components of  $r_{sc}$  structure could be  
812 tested in terms of the number of basis functions needed to best explain the data. In this case, the  $k^{th}$  loading  
813 ( $x_i^{fixed}(k)$  or  $x_i^{task}(k)$ ) was given by:

$$814 \quad x_i(k) = e^{\kappa_k (\cos(\theta_i - \mu_k^1) + \cos(\phi_i - \mu_k^2))} + e^{\kappa_k (\cos(\phi_i - \mu_k^1) + \cos(\theta_i - \mu_k^2))} \quad (4)$$

815 where  $\theta_i$  and  $\phi_i$  are the preferred orientations of the  $i^{th}$  pair (relative to the task orientations in the case of  
816 the task-dependent loadings),  $\mu_k$  is a pair of orientations defining the location of the  $k^{th}$  basis function (fit  
817 to the data), and  $\kappa_k$  is the width of the  $k^{th}$  basis function (fit to the data). Because each basis function has  
818 an independent width and location fit to the data, the model predictions are non-linear functions of the  
819 parameters, unlike in the previously described regression model. Furthermore, the fitting surface has many  
820 local minima because the basis functions can simply be permuted to produce an identical model.  
821 Therefore, the optimal parameters were identified using numerical optimization with an array of starting  
822 points to identify a globally optimal solution. Since each basis function required four parameters  
823 (amplitude, width, and location in two dimensions), the total number of parameters was  $4*m+1$ , where  $m$   
824 is the sum of the number of allowed fixed and task-dependent basis functions and we add an additional  
825 parameter for the model constant.

## 826 **Simple parametric models**

827 We modeled the observed set of  $r_{sc}$  values using two simple parametric models: a “single  
828 eigenvector” model and a “diagonal ridge” model. In the “single eigenvector” model, each observation  $y_i$

829 was modeled as the outer product of an eigenvector  $X$ , evaluated at the relevant pair of orientations. The  
830 eigenvector was parametrized as the difference of two von Mises functions separated by  $90^\circ$ :

$$831 \quad X(\mu) = a_1 e^{\kappa_1 \cos(\mu+b)} - a_2 e^{\kappa_2 \cos(\mu+b+\pi)} \quad (5)$$

832 where  $\mu$  is the difference in preferred orientation and the task orientation (in angle-doubled radians), the  
833  $a$ 's are the amplitudes to be fit, the  $\kappa$ 's are the widths to be fit, and  $b$  is the offset of the eigenvector peak  
834 and trough from the task orientations (allowing a mismatch between the model eigenvector and the task,  
835 and also fit to the data). An observed  $r_{sc}$  value  $y_i$  was described as:

$$836 \quad y_i = X(\theta_i)X(\phi_i) + c + \varepsilon_i \quad (6)$$

837 where  $\theta_i$  and  $\phi_i$  are the task-aligned preferred orientation of the pair and  $c$  is a model constant. The model  
838 contained six total free parameters which were fit using gradient descent to minimize the squared error in  
839 the  $r_{sc}$  predictions.

840 In the “diagonal ridge” model,  $r_{sc}$  values were modeled as a decaying function of the difference in  
841 preferred orientation, independent of task. The dependence was modeled as a von Mises function. A given  
842  $r_{sc}$  value  $y_i$  was modeled as:

$$843 \quad y_i = a \cdot e^{\kappa \cos(\theta_i - \phi_i)} + c + \varepsilon_i \quad (7)$$

844 where  $\theta_i$  and  $\phi_i$  are the preferred orientation of the pair,  $c$  is a model constant, and  $a$  and  $\kappa$  parameterize  
845 the von Mises function. The model contained three total free parameters which were fit using gradient  
846 descent to minimize the squared error in the  $r_{sc}$  predictions.

### 847 **Estimating explainable variance**

848 While the above models did not explain more than a small percentage of the variance of the raw  
849 observed  $r_{sc}$  values, this is not surprising as the raw correlation data do not vary smoothly with preferred  
850 orientation (reflecting both noise, and the fact that  $r_{sc}$  is known to depend on parameters other than

851 orientation.<sup>3,22,23</sup>). For this reason, we measured goodness-of-fit relative to an estimate of the explainable  
852 variance, which we took as the variance explained simply by a smoothed version of the raw data (sum of  
853 values in fixed and task-aligned matrices was 3.6%). Smoothing was performed with a von Mises kernel,  
854 with width chosen to maximize variance explained.

## 855 **Eye movements**

856 Both animals tended to make anticipatory microsaccades near the end of the trial that predict their  
857 upcoming choice, consistent with a prior study<sup>31</sup>. This raised the possibility that choice-related eye  
858 movements gave rise to task-dependent changes in retinal input that explained the correlated fluctuations  
859 we observed. To rule this out, we measured the task-aligned  $r_{sc}$  matrix using a subset of trials on each  
860 session for which fixational eye position was not predictive of choice. To identify these trials, we used  
861 linear discriminant analysis (LDA) to predict the subject's choices using the time series of mean binocular  
862 eye-position recorded on each trial. Then, we iteratively removed trials, starting with those furthest from  
863 the classification boundary, until classification performance no longer exceeded chance. This analysis  
864 (Supplementary Fig. 7) was restricted to the first 1.5 seconds of the trial, because we found that  
865 considering later time points (where most anticipatory microsaccades occurred) required discarding too  
866 many trials.

## 867 **Choice probability predictions**

868 Choice Probability was calculated in the standard way<sup>35</sup>. We only used 0%-signal trials, as the  
869 uneven choice distributions elicited by signal trials yield noisier CP measurements. Assuming feedforward  
870 pooling with linear readout weights, the relationship between the covariance matrix for a population of  
871 neurons, the readout weight of each neuron, and the Choice Probability ( $CP$ ) of each neuron is:

$$872 \quad CP_k = \frac{1}{2} + \frac{2}{\pi} \operatorname{sgn}(\xi_k) \arctan \sqrt{2\xi_k^{-2} - 1}^{-1} \quad \text{with} \quad \xi_k = \frac{(C\beta)_k}{\sqrt{C_{kk}\beta^T C\beta}} \quad (8)$$

873 where  $CP_k$  is the CP of neuron  $k$  with respect to choice 1,  $\beta$  is the vector of readout weights and  $\mathbf{C}$  is the  
874 covariance matrix<sup>17</sup>. We used this known relationship to quantify the CPs that would be associated with  
875 the  $r_{sc}$  structure we observed and the fixed and task-dependent components we identified, assuming only a  
876 feedforward source of CP (Fig. 8). CPs,  $r_{sc}$  structure, and readout weights were described as task-aligned  
877 functions of preferred orientation. This is equivalent to assuming a population of infinite size that is  
878 homogeneous at a given orientation. For the fixed component of  $r_{sc}$ , which was indexed relative to raw  
879 orientation preferences, we generated a task-aligned version by substituting the observed  $r_{sc}$  values with  
880 model fits (using only a fixed component of the model) and then generating a smoothed task-aligned  
881 matrix as in Fig. 2e, using these substituted values. To guarantee real-valued CPs on  $[0,1]$ , we performed  
882 the calculations using a symmetric positive definite approximation<sup>55</sup> of the  $r_{sc}$  matrices, which introduced  
883 negligible error.

884 Since the readout weights were unknown, we generated a random distribution of 1000 plausible  
885 readout weight profiles that could support task performance. To generate a sample from this distribution,  
886 we started with a vector of random weights (drawn from a normal distribution) and applied the  $90^\circ$   
887 symmetry inherent in the task, such that  $\beta_\theta = -\beta_{\theta+90}$ , where  $\beta_\theta$  is the weight assigned to neurons with  
888 task-aligned preferred orientation  $\theta$ . Then, we smoothed with a wrapped Gaussian kernel with  $15^\circ$  s.d. and  
889 excluded profiles which did not have a circular mean within  $22.5^\circ$  of choice 1 ( $0^\circ$ ). In practice, we found  
890 the CP predictions to be insensitive to the readout weights (Supplementary Fig. 9), which is not surprising  
891 for a nearly rank-1 matrix (since for exactly rank-1 matrices, the CPs are independent of the weights)<sup>17</sup>.

892 We can use correlations interchangeably with covariances in Eq. 8, under the simplifying  
893 assumption that the variance is uniform as a function of preferred orientation. If  $\Sigma$  is the correlation matrix  
894 for a population with uniform variance  $\alpha$ , then it follows that:

895 
$$\xi_k = \frac{\alpha(\Sigma\beta)_k}{\sqrt{\alpha\Sigma_{kk}\beta^T(\alpha\Sigma)\beta}} = \frac{(\Sigma\beta)_k}{\sqrt{\Sigma_{kk}\beta^T\Sigma\beta}} \quad (9)$$



896 where  $\Sigma_{kk} \equiv 1$  for all  $k$ . We felt that spike-count variance that depended systematically on preferred  
897 orientation was unlikely to be a feature of the V1 representation, and thus that the advantages of using  
898 correlations outweighed the cost.

899 Noise in the decision process after pooling (pooling noise) has the effect of uniformly scaling  
900 down CPs, such that  $\xi_k$  in Eq. 8 is substituted with:  $\frac{(c\beta)_k}{\sqrt{c_{kk}(\beta^T c\beta + \sigma_{pool}^2)}}$ , where  $\sigma_{pool}^2$  is the variance of the  
901 pooling noise<sup>6</sup>. We found that non-zero pooling noise was needed to avoid overestimating the magnitude  
902 of CP from the observed correlation structure. We used a fixed value of pooling noise in our predictions  
903 such that the average squared difference between the CP profile predicted from the observed correlation  
904 matrix and the observed CP profile was minimized. Empirically, we found that pooling noise variance of  
905 0.6 was optimal. Since our spike counts were normalized to have unit variance, this implies pooling noise  
906 whose variance is 60% of the average spike-count variance of single neurons. This should be interpreted  
907 with care, as overestimation of CPs may also be an artefact related to the assumption of a homogeneous  
908 population<sup>17</sup>. Alternatively, the need to invoke pooling noise may be due to nonuniform sensory  
909 integration across the trial, which is distinct but which would also have an attenuating effect on CP when  
910 measured over the entire trial.

## 911 **Statistics**

912 Statistical tests were performed non-parametrically using bootstrapping or other resampling  
913 methods, as described, with 1,000 resamples. Nonparametric statistical testing is superior when the  
914 underlying distribution of the data cannot be assumed. When p-values of  $p < 0.001$  are reported, this  
915 indicates the null hypothesis can be ruled out with the most confidence possible given the number of  
916 resamples performed. In most cases, resampling was performed from the set of recorded neuronal pairs  
917 ( $n=811$ ), and always with replacement. In all figures, one asterisk indicates significant at the  $p < 0.05$  level,  
918 two indicates  $p < 0.01$ , and three indicates  $p < 0.001$ . When standard error bars are shown, this makes the  
919 assumption of normality in the bootstrap distribution of the test statistic. However, this assumption was

920 not formally tested. No statistical methods were used to predetermine sample sizes but our sample sizes  
921 are similar to those of previous publications<sup>22,23,27</sup>.

922 **Data availability**

923 All relevant data are available upon reasonable request from the authors.

924 **Code availability**

925 All computer code used to generate the results are available upon request from the authors.

926

- 927 51. Judge, S. J., Richmond, B. J. & Chu, F. C. Implantation of magnetic search coils for measurement  
928 of eye position: An improved method. *Vision Res.* **20**, 535–538 (1980).
- 929 52. Cumming, B. G. & Parker, A. J. Binocular neurons in V1 of awake monkeys are selective for  
930 absolute, not relative, disparity. *J. Neurosci.* **19**, 5602–18 (1999).
- 931 53. Burgess, A. E. & Colborne, B. Visual signal detection. IV. Observer inconsistency. *J. Opt. Soc.*  
932 *Am. A. Opt. Image Sci. Vis.* **5**, 617–627 (1988).
- 933 54. Kang, I. & Maunsell, J. H. R. Potential confounds in estimating trial-to-trial correlations between  
934 neuronal response and behavior using choice probabilities. *J. Neurophysiol.* **108**, 3403–15 (2012).
- 935 55. Higham, N. J. Computing a nearest symmetric positive semidefinite matrix. *Linear Algebra Appl.*  
936 **103**, 103–118 (1988).
- 937
